# Supplementary material for: Dissociation of ERK signalling inhibition from the anti-amyloidogenic action of synthetic ceramide analogues
Source: Oxford University Press journal article supplement (doi:10.1042/cs20110257), 2011-11-22
Supplement: cs1220409add.pdf [file cs1220409add.pdf]

# Dissociation of ERK signalling inhibition from the anti-amyloidogenic action of synthetic ceramide analogues

Hongyun LI\*<sup>†</sup>, Genevieve EVIN<sup>‡</sup>§, Andrew F. HILLS<sup>||</sup>, Ya Hui HUNG<sup>§¶</sup>, Ashley I. BUSH<sup>§</sup> and Brett GARNER\*<sup>†</sup>

\*Illawarra Health and Medical Research Institute, University of Wollongong, Wollongong, NSW 2522, Australia, <sup>†</sup>School of Biological Sciences, University of Wollongong, Wollongong, NSW 2522, Australia, <sup>‡</sup>Department of Pathology, University of Melbourne, Melbourne, VIC 3010, Australia, <sup>§</sup>Mental Health Research Institute, University of Melbourne, Melbourne, VIC 3010, Australia, <sup>||</sup>Department of Biochemistry and Molecular Biology, Bio21 Institute, University of Melbourne, Melbourne, VIC 3010, Australia, and <sup>¶</sup>Centre for Neuroscience, University of Melbourne, Melbourne, VIC 3010, Australia

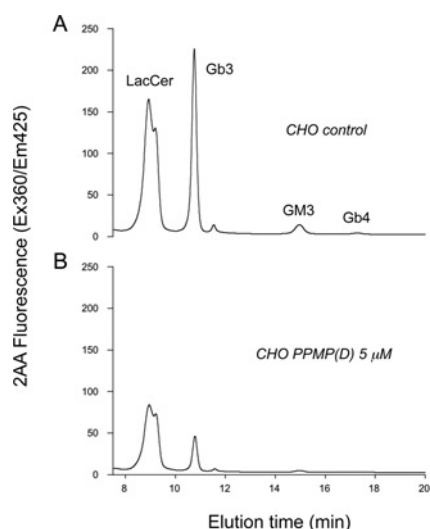

**Figure S1** Inhibition of CHO-APP GSL levels by D-PPMP

CHO-APP cells were incubated for 48 h in the absence (upper profile, 'CHO control') or presence (lower profile, 'CHO PPMP(D) 5 μM') of 5 μM D-PPMP. Lipids were extracted and GSL glycans were analysed by HPLC as described in the legend to Figure 8. Gb3, globotriaosylceramide; Gb4, globotetraosylceramide; GM3, ganglioside G<sub>M3</sub>.

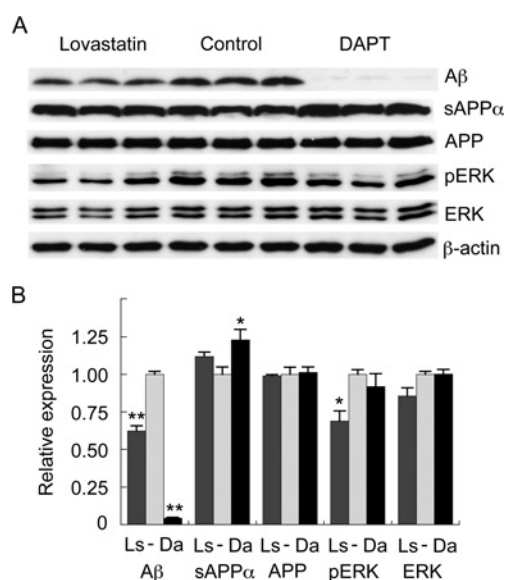

**Figure S2** Influence of lovastatin and DAPT (two anti-amyloidogenic non-GSL-modifying compounds) on ERK activation

CHO-APP cells were treated with lovastatin (1 μM) or DAPT (1 μM) for 48 h, and secreted Aβ and sAPPα and cellular APP and total ERK and pERK (A) were measured by Western blotting with β-actin used as a loading control. Absorbance measurements of the Western blots are shown in the histograms (B): grey bars, control; dark grey bars, lovastatin treated; and black bars, DAPT treated. Results are mean ± S.E.M. values; \*P < 0.05, \*\*P < 0.01.

Received 13 May 2011/28 October 2011; accepted 21 November 2011  
Published as Immediate Publication 21 November 2011, doi:10.1042/CS20110257
